# Supplementary figures and images for: Coniocybe Ach. Revisited
Source: MDPI journal article supplement (doi:10.3390/jof10050363), 2024-05-20

Figure S1: ITS phylogeny

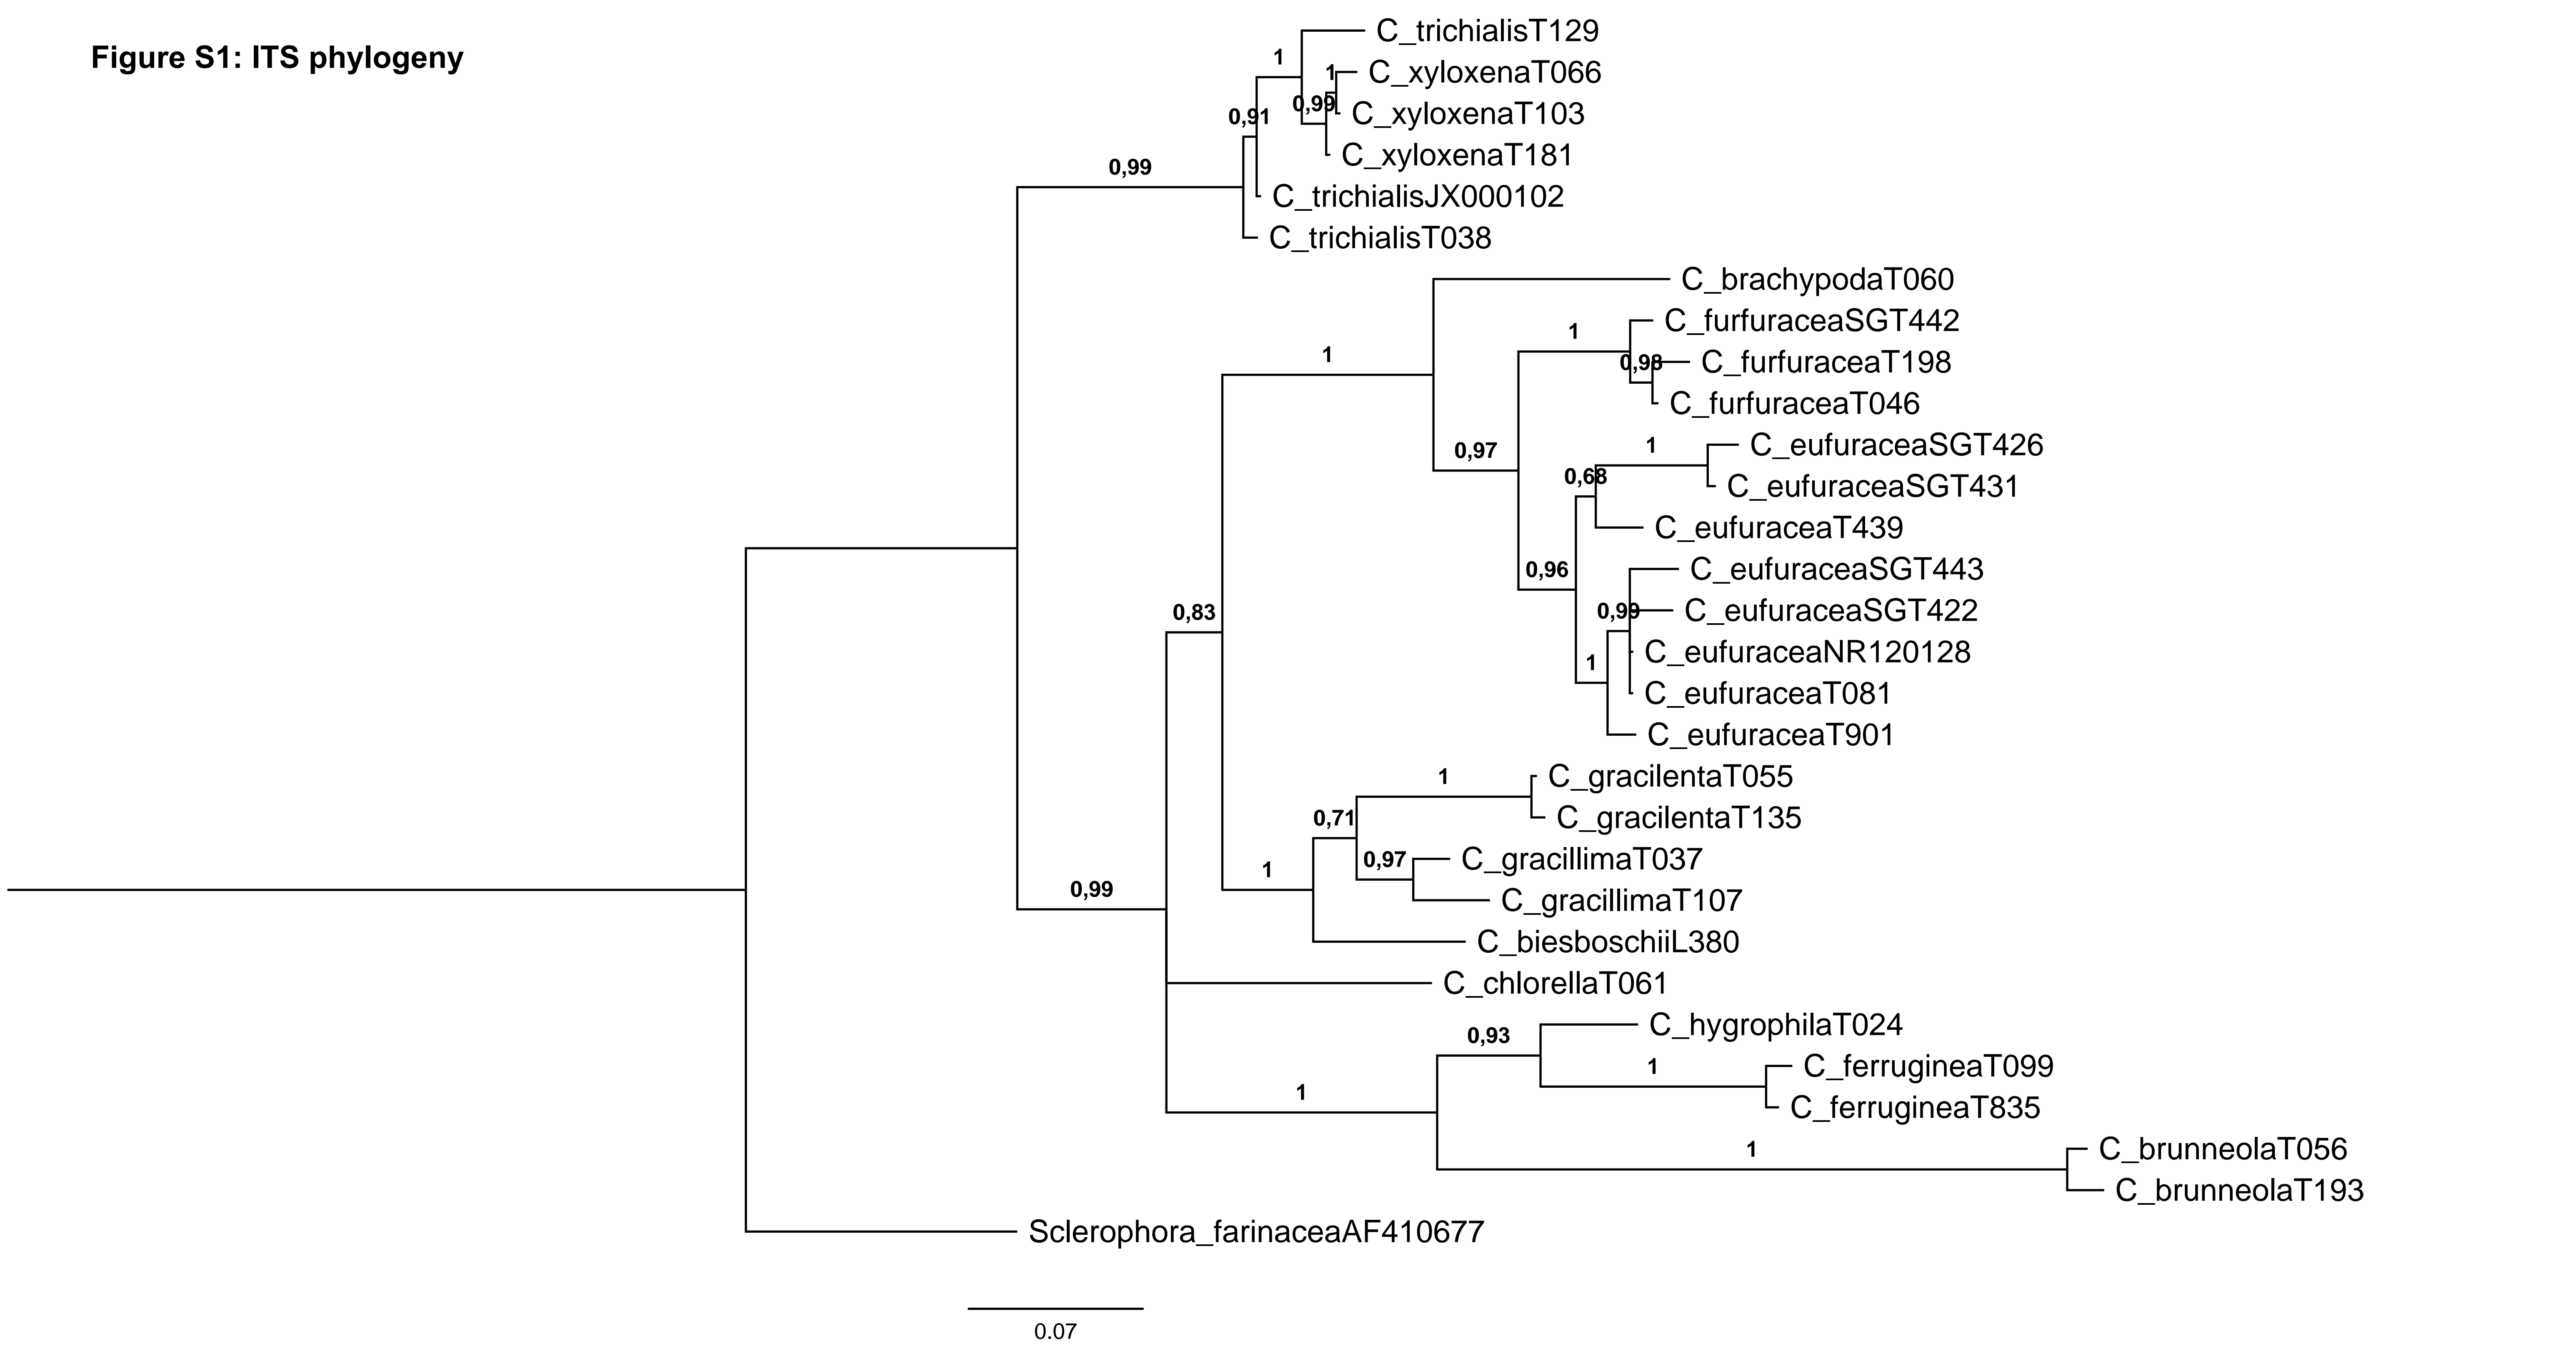

Figure S2: LSU phylogeny

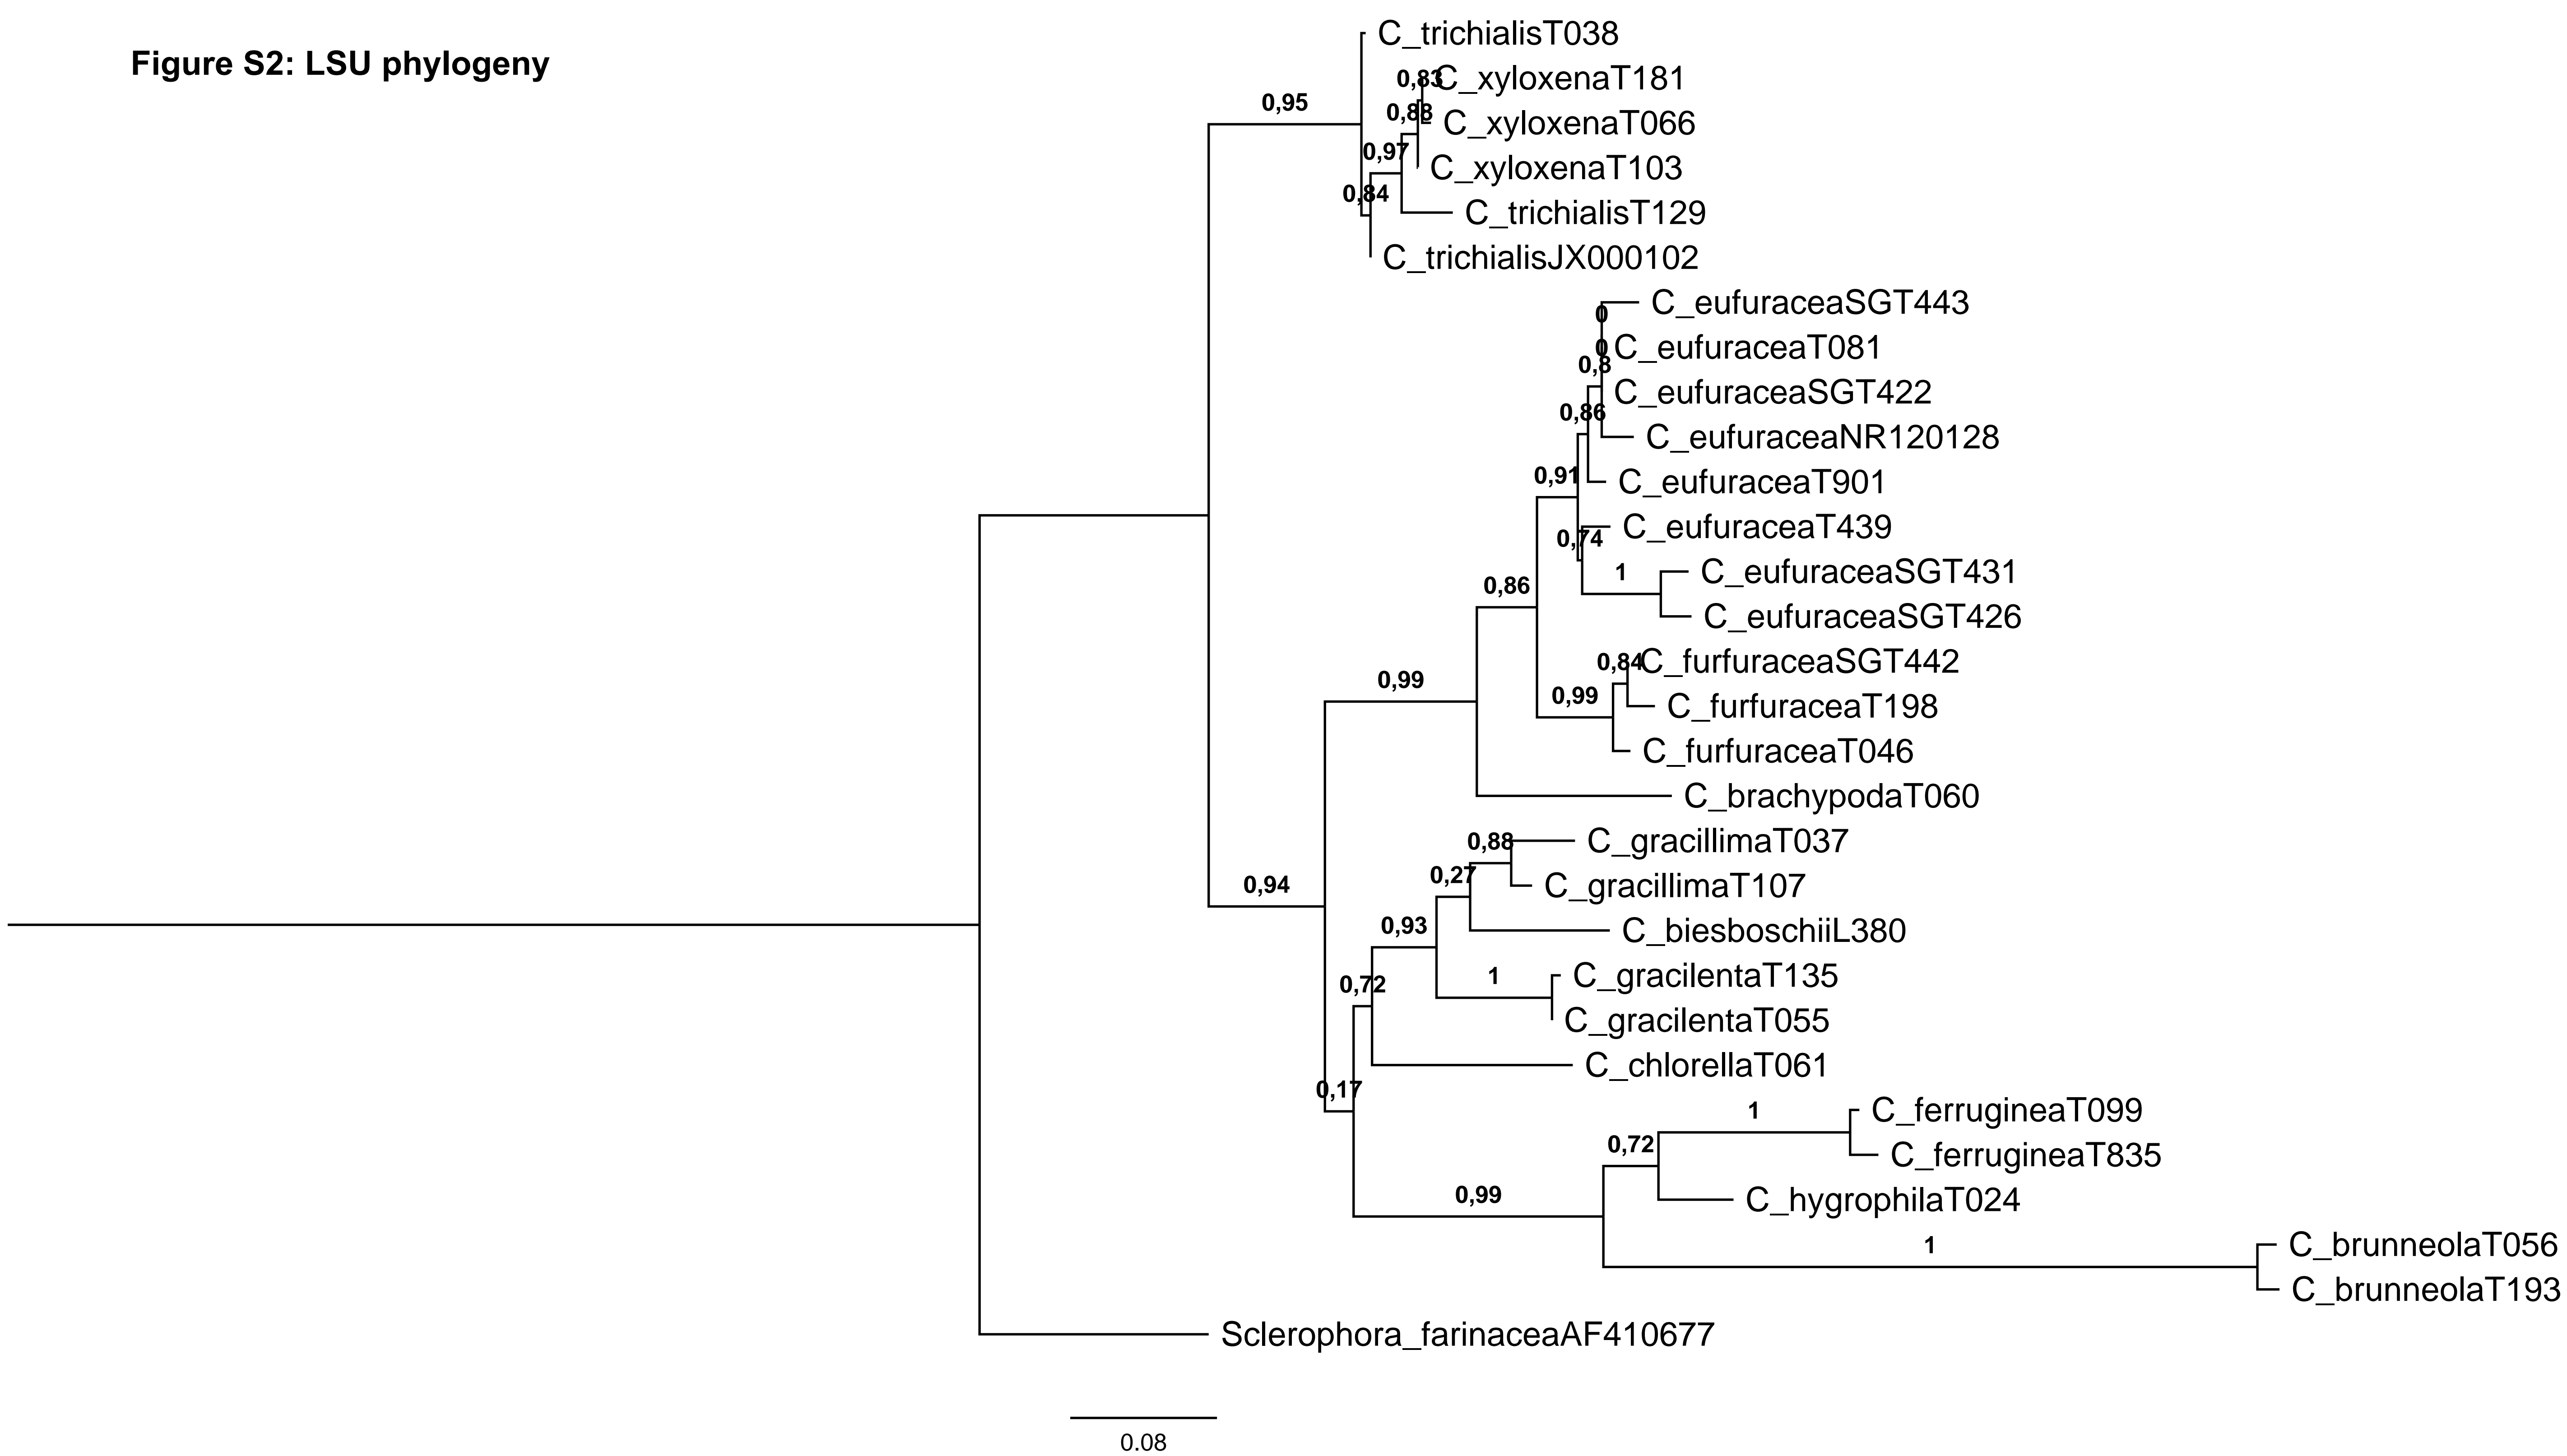

Figure S3: RPB1 phylogeny

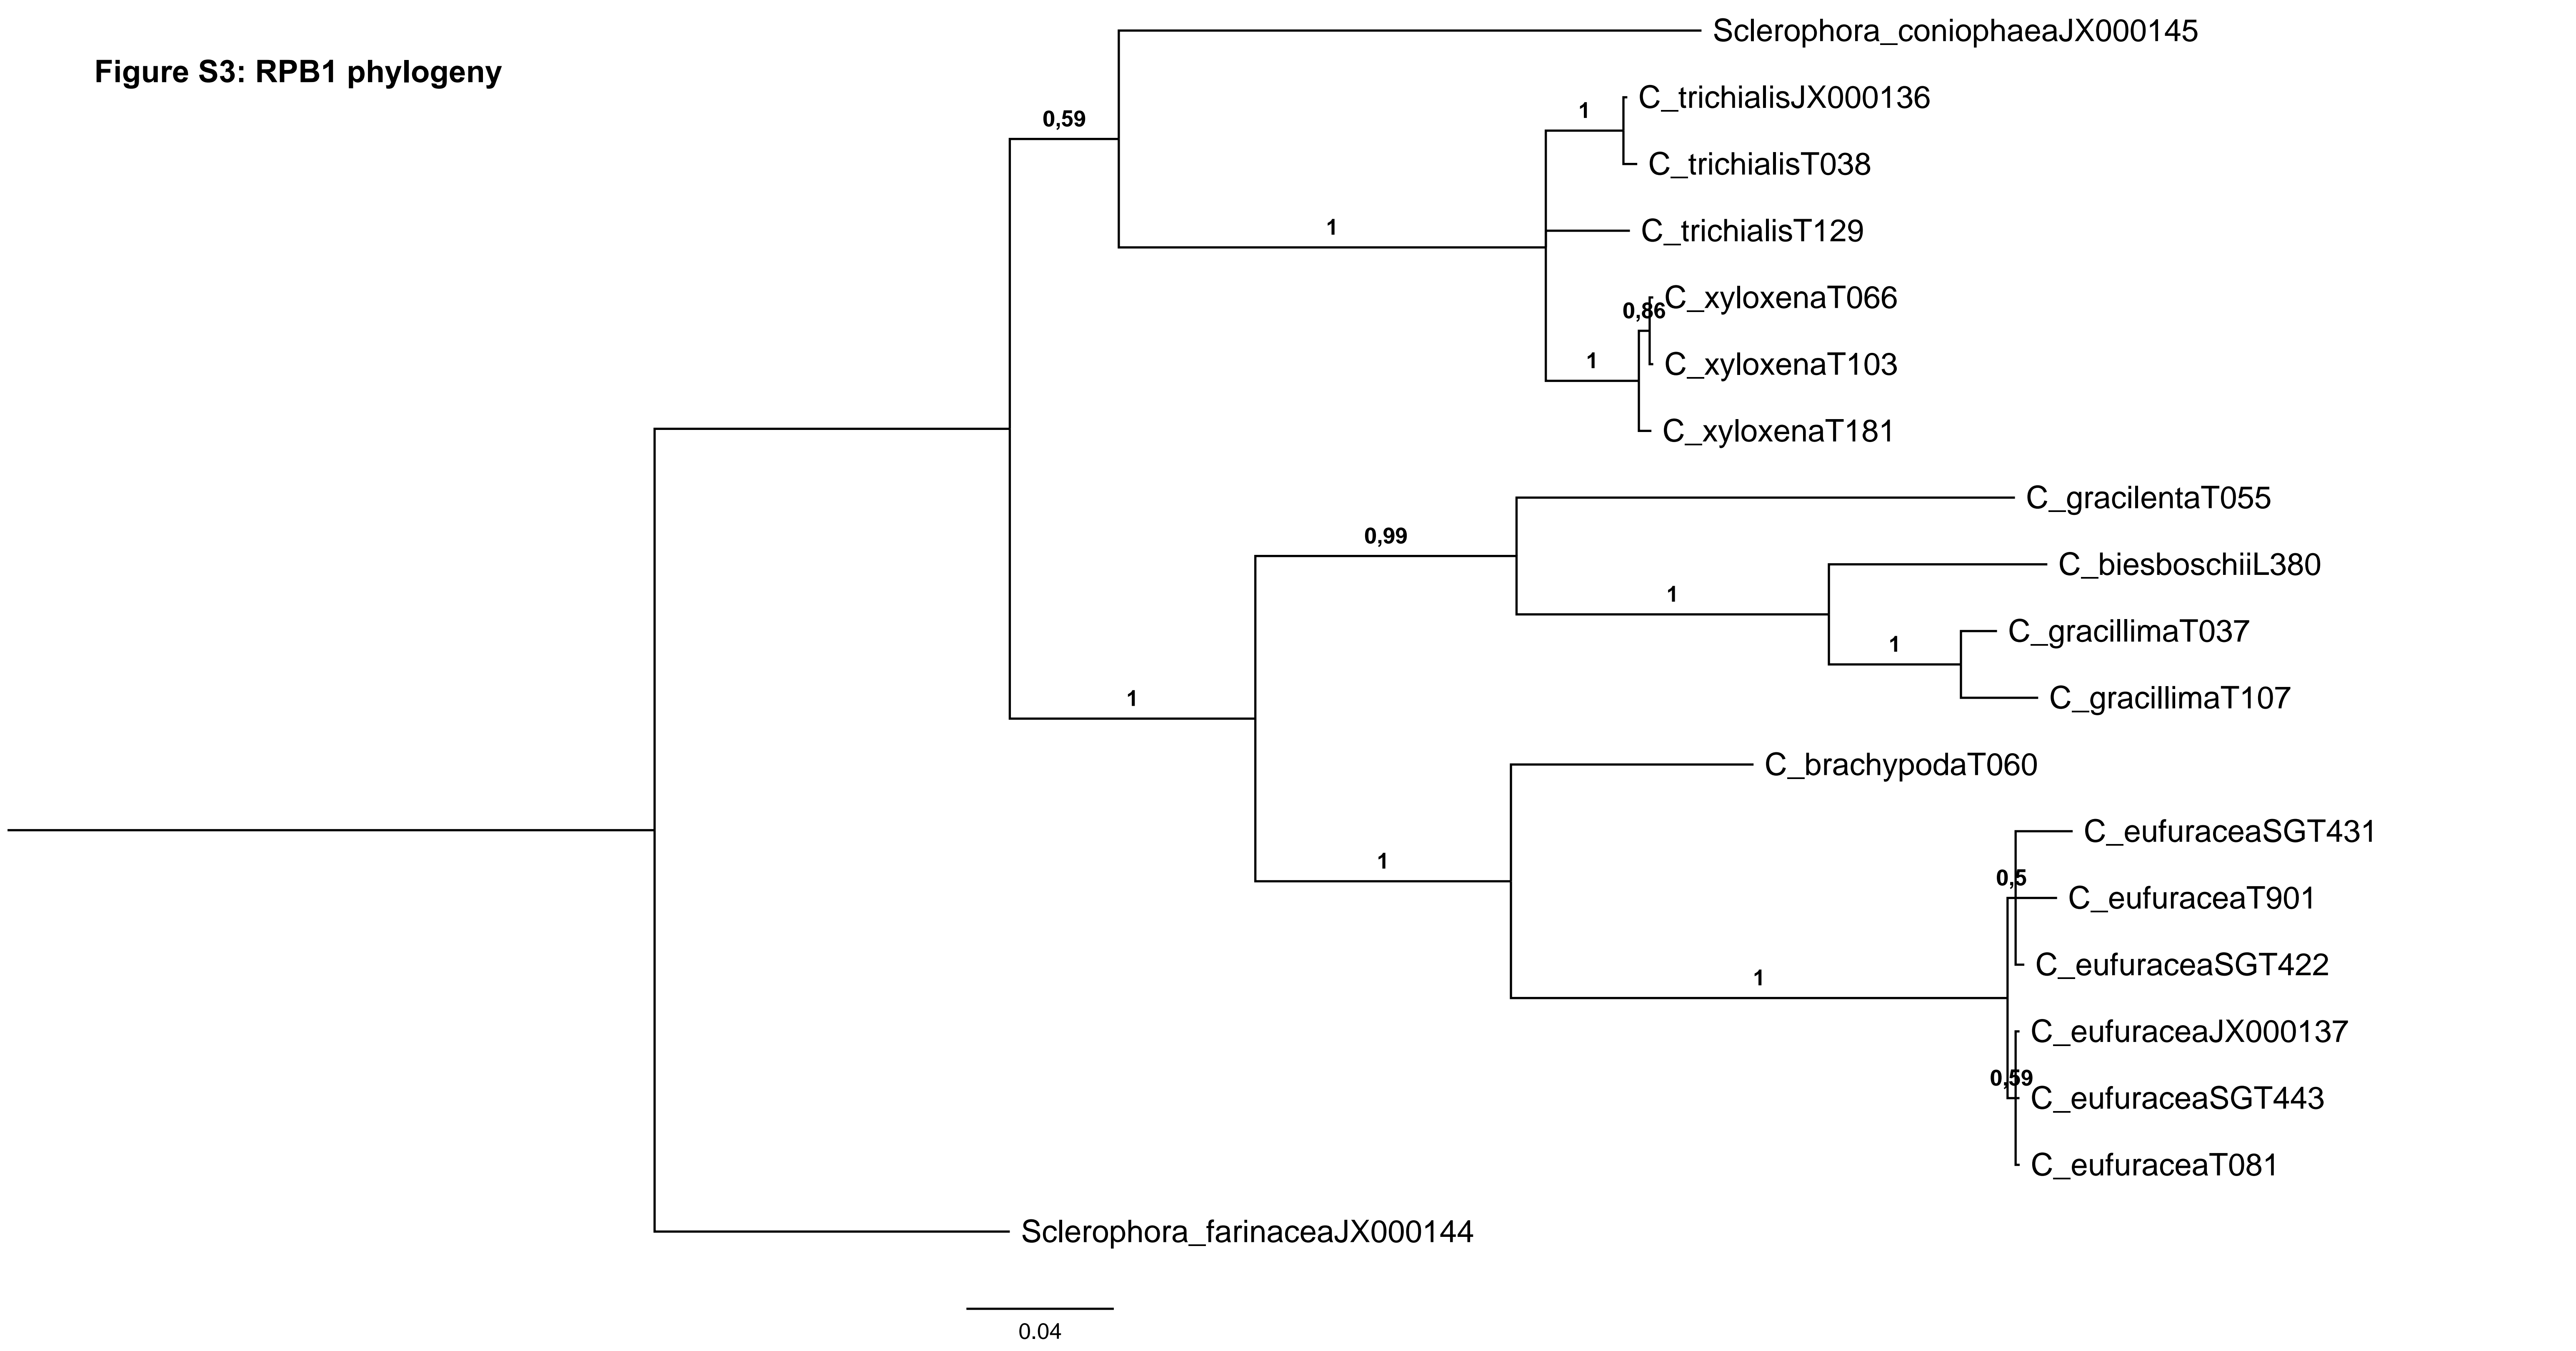

Supplement: s1 [file s1]
